# Supplementary material for: Preparation of Sm-doped CaZrO3 nanosheets for facile human serum exosome isolation
Source: Royal Society of Chemistry journal article supplement (doi:10.1039/d1nj01055g), 2021-01-01
Supplement: d1nj01055g1.pdf [file d1nj01055g1.pdf]

## Supporting information

Preparation of Sm-doped CaZrO<sub>3</sub> nanosheets for facile human serum  
exosome isolation

Hongchao Geng<sup>a,1</sup>, Guangyao Wu<sup>b,1</sup>, Chenyi Li<sup>a</sup>, Jie Song<sup>a</sup>, Ping Chen<sup>b,\*</sup>, Qingyun  
Cai<sup>a,\*</sup>

<sup>a</sup>State Key Laboratory of Chemo/Biosensing and Chemometrics, College of  
Chemistry and Chemical Engineering, Hunan University, Changsha 410082, China.

<sup>b</sup>State Key Laboratory of Developmental Biology of Freshwater Fish, The National &  
Local Joint Engineering Laboratory of Animal Peptide Drug Development, College of  
Life Sciences, Hunan Normal University, Changsha 410081, P. R. China.

E-mail: qycai0001@hnu.edu.cn; chenp@hunnu.edu.cn

Table S1 Detail information of the protein spots from serum exosome isolated by using preparation of CaZrO<sub>3</sub>:Sm.

| Index | Protein Group Accessions | Peptide Sequence   | MH+ [Da] |
|-------|--------------------------|--------------------|----------|
| N1    | A0A024R6I7               | ITPNLAEFASFSLYR    | 46850    |
| N3    | A0A024R6I7               | ITPNLAEFASFSLYR    | 46850    |
| N4    | A0A087WU08               | YVMLPVADQDQCIR     | 31673    |
| N5    | A0A087WU08               | YVMLPVADQDQCIR     | 31673    |
| N6    | A0A087WU08               | YVMLPVADQDQCIR     | 31673    |
| N9    | H0Y7L5                   | AYKSELEEQLTPVAEETR | 30733    |
| N10   | P02743                   | IVLGQEQDSYGGKFDR   | 25485    |
| N11   | A0A5H1ZRQ3               | SGTASVVCLLNNFYPR   | 11884    |
| N12   | A0A5H1ZRQ3               | SGTASVVCLLNNFYPR   | 11884    |
| N13   | A0A5H1ZRQ3               | SGTASVVCLLNNFYPR   | 11884    |
| N14   | A0A5H1ZRQ3               | SGTASVVCLLNNFYPR   | 11884    |
| N15   | A0A5H1ZRQ3               | SGTASVVCLLNNFYPR   | 11884    |
| N16   | A0A5H1ZRQ3               | SGTASVVCLLNNFYPR   | 11884    |
| N17   | A0A5H1ZRQ3               | SGTASVVCLLNNFYPR   | 11884    |
| N32   | A0A5H1ZRQ3               | SGTASVVCLLNNFYPR   | 11884    |
| N35   | A0A5H1ZRQ3               | SGTASVVCLLNNFYPR   | 11884    |
| N36   | A0A286YFJ8               | GPSVFPLAPCSR       | 44431    |
| N39   | A0A5H1ZRQ3               | SGTASVVCLLNNFYPR   | 11884    |
| N40   | P02743                   | IVLGQEQDSYGGKFDR   | 25485    |
| N40   | A0A5H1ZRQ3               | SGTASVVCLLNNFYPR   | 11884    |
| N42   | A0A5H1ZRQ3               | SGTASVVCLLNNFYPR   | 11884    |
